# Supplementary material for: Metabolic Signature of Dietary Iron Overload in a Mouse Model
Source: MDPI journal article supplement (doi:10.3390/cells7120264), 2018-12-11
Supplement: s1 [file s1]

# SUPPLEMENTARY INFORMATION

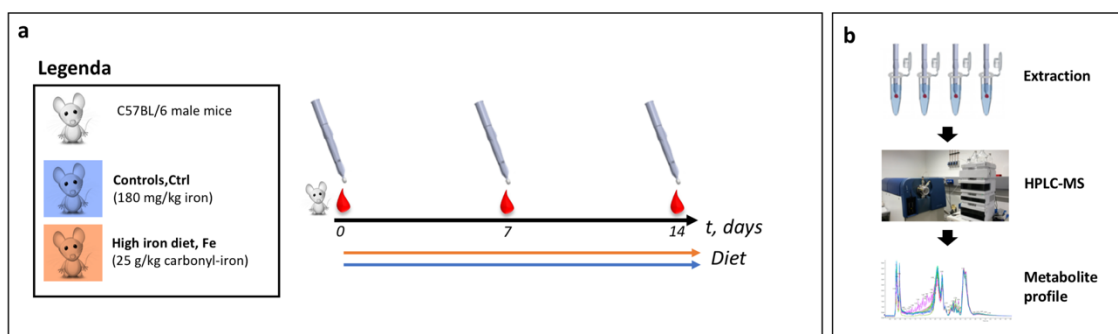

**Figure S1.** Experimental design to monitor metabolic changes during dietary iron overload. Ten-week-old C57BL/6 male animals (**a**) were randomized either to the control group, fed a normal diet (control animals), or to the treatment group, fed a high-iron diet (Fe animals). On day 0, day 7 and day 14 blood was sampled by means of volumetric absorptive microsampling (VAMS). At day 14 animals were sacrificed, liver and plasma were collected. Blood metabolites (**b**) were extracted and measured according to the method described [17]. Plasma and liver metabolites were also analyzed as described in the section Materials and Methods.

## SUPPLEMENTARY Figure 2

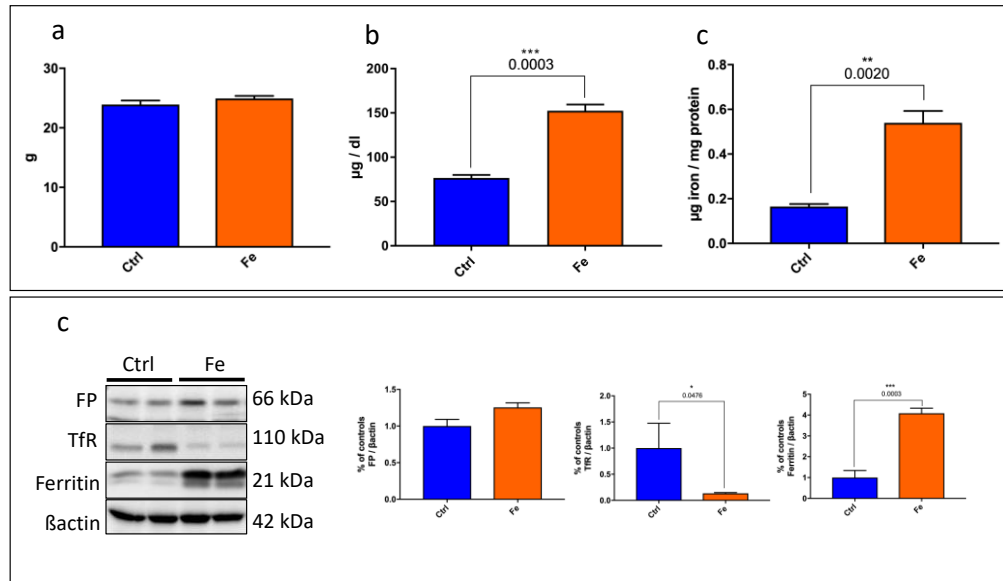

**Figure S2.** Dietary iron overload increases both plasma iron levels as well as liver expression of ferritin. Animal weight measured after two weeks of diet (a). Plasma (b) iron and liver (c) iron content analysis. Liver (c) representative Western blot of the expression of iron-related proteins and quantitative analysis from all samples normalized to beta-actin and presented as % of the controls. FP: ferroportin; TfR: transferrin receptor. Controls (Ctrl, blue, n = 3), high-iron diet (Fe, orange, n = 5). Statistics: student t-test was performed, a p-value <0.05 was considered to be significant, the exact p-values are indicated in the graphs.
